# Supplementary material
Source: ML conference proceedings conference paper supplement (https://proceedings.mlr.press/v139/bistritz21a.html)
Supplement: Supplementary file [file bistritz21a-supp.pdf]

## 9. Proof of Lemma 1

Let  $(\mathbf{x}^*, \boldsymbol{\alpha}^*)$  be a solution to the VI in (17). We want to show that  $(\mathbf{x}^*, \boldsymbol{\alpha}^*) \in \mathcal{N}_{\text{opt}}$ . First, since the VI holds for all  $\mathbf{x}, \boldsymbol{\alpha}$  we can pick  $\boldsymbol{\alpha} = \boldsymbol{\alpha}^*$ , so for all  $\mathbf{x} \in \mathcal{X}$

$$\langle \mathbf{x} - \mathbf{x}^*, F(\mathbf{x}^*, \boldsymbol{\alpha}^*) \rangle \leq 0. \quad (21)$$

Then by Proposition 1.4.2 in (Facchinei & Pang, 2007),  $\mathbf{x}^*$  is a NE (note that because  $F(\mathbf{x}, \boldsymbol{\alpha}^*)$  is strongly monotone in  $\mathbf{x}$ , then  $r_n(\mathbf{x}_n, \mathbf{x}_{-n})$  is concave in  $\mathbf{x}_n$  for each  $n$  and  $\mathbf{x}_{-n}$ ).

For any  $k$ , we can pick  $\mathbf{x} = \mathbf{x}^*$  and  $\boldsymbol{\alpha} = \boldsymbol{\alpha}_0$  such that  $\alpha_0^l = \alpha^{*l}$  for all  $l \neq k$  and  $\alpha_0^k = \alpha^{*k} + \varepsilon$  for some  $\varepsilon > 0$ , and get from the VI in (17) that

$$\varepsilon \sum_{n=1}^N (x_n^{*k} - l_k^*) \leq 0 \implies \sum_{n=1}^N x_n^{*k} \leq l_k^*. \quad (22)$$

Now let  $k$  be a coordinate for which  $\alpha^{*k} > 0$  (if it exists) and pick  $\mathbf{x} = \mathbf{x}^*$  and  $\boldsymbol{\alpha} = \boldsymbol{\alpha}_0$  such that  $\alpha_0^l = \alpha^{*l}$  for all  $l \neq k$  and  $\alpha_0^k = 0$ . Then the VI in (17) gives

$$\alpha^{*k} \sum_{n=1}^N (x_n^{*k} - l_k^*) \geq 0 \quad (23)$$

so from (22) and (23) we conclude that  $\sum_{n=1}^N x_n^{*k} = l_k^*$ . Hence for every  $\boldsymbol{\alpha}^* \in \mathcal{A}^*$  we have that for all  $k$

$$\sum_{n=1}^N x_n^{*k} = l_k^* \text{ or } \left[ \sum_{n=1}^N x_n^{*k} < l_k^* \text{ and } \alpha_k = 0 \right] \quad (24)$$

so  $(\mathbf{x}^*, \boldsymbol{\alpha}^*) \in \mathcal{N}_{\text{opt}}$ .

Now let  $(\mathbf{x}^*(\boldsymbol{\alpha}^*), \boldsymbol{\alpha}^*) \in \mathcal{N}_{\text{opt}}$ . We want to show that  $(\mathbf{x}^*(\boldsymbol{\alpha}^*), \boldsymbol{\alpha}^*)$  solves the VI in (17). Since  $\boldsymbol{\alpha}^*$  satisfies (24) for all  $k$  then for every  $\boldsymbol{\alpha} \in \mathbb{R}_+^K$

$$\left\langle \boldsymbol{\alpha} - \boldsymbol{\alpha}^*, \sum_{n=1}^N \mathbf{x}_n^*(\boldsymbol{\alpha}^*) - \mathbf{l}^* \right\rangle = \left\langle \boldsymbol{\alpha}, \sum_{n=1}^N \mathbf{x}_n^*(\boldsymbol{\alpha}^*) - \mathbf{l}^* \right\rangle \leq 0. \quad (25)$$

Additionally, Since  $\mathbf{x}^*(\boldsymbol{\alpha}^*)$  is a NE then by Proposition 1.4.2 in (Facchinei & Pang, 2007) we have for all  $\mathbf{x} \in \mathcal{X}$

$$\langle \mathbf{x} - \mathbf{x}^*, F(\mathbf{x}^*(\boldsymbol{\alpha}^*), \boldsymbol{\alpha}^*) \rangle \leq 0. \quad (26)$$

Hence  $(\mathbf{x}^*(\boldsymbol{\alpha}^*), \boldsymbol{\alpha}^*)$  is a solution to the VI.

## 10. Proof of Lemma 2

We start by showing that a large enough  $\boldsymbol{\alpha}_0$  leads to a NE where the total loads are below  $\mathbf{l}^*$ . Let

$$\mathcal{U}_n = \left\{ \mathbf{x}_n \mid 0 \leq x_n^k < \frac{l_k^*}{N}, \forall k \right\} \quad (27)$$

and let  $\mathcal{X}' = \mathcal{X} \setminus \mathcal{U}_1 \times \dots \times \mathcal{U}_N$ , which is a closed set as the difference of a closed and an open set. Since  $r_n(\mathbf{x})$  is continuous on the compact set  $\mathcal{X}'$  then  $\max_{n, \mathbf{x} \in \mathcal{X}'} r_n(\mathbf{x}) \leq M$  for some  $M > 0$ . If we choose  $\alpha_0^k \geq 2N \frac{M}{l_k^*}$  for all  $k$ , then for some player  $n$  and for all  $\mathbf{x} \in \mathcal{X}'$

$$u_n(\mathbf{x}) = r_n(\mathbf{x}) - \sum_{k=1}^K \alpha_0^k x_n^k \leq M \left( 1 - 2 \sum_{k=1}^K \frac{N}{l_k^*} x_n^k \right) < 0. \quad (28)$$

Hence, no  $\mathbf{x} \in \mathcal{X}'$  is a NE since by switching to  $\mathbf{x}_n = \mathbf{0}$  player  $n$  receives  $u_n(\mathbf{x}) = 0$ . We conclude that  $\mathbf{x}^*(\boldsymbol{\alpha}_0) \in \mathcal{U}_1 \times \dots \times \mathcal{U}_N$ , so  $\sum_{n=1}^N x_n^{*k}(\boldsymbol{\alpha}_0) \leq l_k^*$  for all  $k$ .

Next we use this  $\boldsymbol{\alpha}_0$  to argue about the set of solutions to our VI in (17). For each  $\boldsymbol{\alpha}$  we have

$$\begin{aligned} \langle \mathbf{x} - \mathbf{x}^*(\boldsymbol{\alpha}_0), F(\mathbf{x}, \boldsymbol{\alpha}) \rangle &+ \left\langle \boldsymbol{\alpha} - \boldsymbol{\alpha}_0, \sum_{n=1}^N \mathbf{x}_n - \mathbf{l}^* \right\rangle \stackrel{(a)}{\leq} \\ &\langle \mathbf{x} - \mathbf{x}^*(\boldsymbol{\alpha}_0), F(\mathbf{x}^*(\boldsymbol{\alpha}_0), \boldsymbol{\alpha}) \rangle + \\ &\left\langle \boldsymbol{\alpha} - \boldsymbol{\alpha}_0, \sum_{n=1}^N \mathbf{x}_n - \mathbf{l}^* \right\rangle = \\ &\langle \mathbf{x} - \mathbf{x}^*(\boldsymbol{\alpha}_0), F(\mathbf{x}^*(\boldsymbol{\alpha}_0), \boldsymbol{\alpha}_0) \rangle + \\ &\left\langle \sum_{n=1}^N (\mathbf{x}_n - \mathbf{x}_n^*(\boldsymbol{\alpha}_0)), \boldsymbol{\alpha}_0 - \boldsymbol{\alpha} \right\rangle + \\ &\left\langle \boldsymbol{\alpha} - \boldsymbol{\alpha}_0, \sum_{n=1}^N \mathbf{x}_n - \mathbf{l}^* \right\rangle \stackrel{(b)}{\leq} \\ &\left\langle \boldsymbol{\alpha} - \boldsymbol{\alpha}_0, \sum_{n=1}^N \mathbf{x}_n^*(\boldsymbol{\alpha}_0) - \mathbf{l}^* \right\rangle \end{aligned} \quad (29)$$

where (a) uses the monotonicity of  $F(\mathbf{x}, \boldsymbol{\alpha})$  in  $\mathbf{x}$  and (b) follows since  $\mathbf{x}^*(\boldsymbol{\alpha}_0)$  is a NE (Proposition 1.4.2 in (Facchinei & Pang, 2007)). Hence the set

$$\begin{aligned} L_{\geq} = &\left\{ (\mathbf{x}, \boldsymbol{\alpha}) \in \mathcal{X} \times \mathbb{R}_+^K \mid \langle \mathbf{x} - \mathbf{x}^*(\boldsymbol{\alpha}_0), F(\mathbf{x}, \boldsymbol{\alpha}) \rangle \right. \\ &\left. + \left\langle \boldsymbol{\alpha} - \boldsymbol{\alpha}_0, \sum_{n=1}^N \mathbf{x}_n - \mathbf{l}^* \right\rangle \geq 0 \right\} \end{aligned} \quad (30)$$

is bounded, since (29) shows that

$$L_{\geq} \subseteq \{(\mathbf{x}, \boldsymbol{\alpha}) \mid \mathbf{x} \in \mathcal{X}, \boldsymbol{\alpha} \in \mathcal{C}\} \quad (31)$$

where  $\mathcal{C}$  is the following bounded convex polytope

$$\begin{aligned} \mathcal{C} = &\left\{ \boldsymbol{\alpha} \in \mathbb{R}_+^K \mid \left\langle \boldsymbol{\alpha} - \boldsymbol{\alpha}_0, \sum_{n=1}^N \mathbf{x}_n^*(\boldsymbol{\alpha}_0) - \mathbf{l}^* \right\rangle \geq 0 \right\} = \\ &\left\{ \boldsymbol{\alpha} \in \mathbb{R}_+^K \mid \langle \boldsymbol{\alpha}, \mathbf{v} \rangle \leq \underbrace{\langle \boldsymbol{\alpha}_0, \mathbf{v} \rangle}_{\geq 0} \right\} \end{aligned} \quad (32)$$

where  $v = \sum_{n=1}^N (l^* - x_n^*(\alpha_0)) \geq 0$ . Therefore according to Proposition 2.2.3 in (Facchinei & Pang, 2007) the set of solutions to the VI in (17) is non-empty and compact, which by Lemma 1 is  $\mathcal{N}_{\text{opt}} = \mathcal{X}^* \times \mathcal{A}^*$ .

## 11. Proof of Lemma 3

Note that  $\mathcal{X} \triangleq \mathcal{X}_1 \times \dots \times \mathcal{X}_N$  is closed and convex since  $\mathcal{X}_n$  is closed convex for each  $n$ . Also note that  $F(x, \alpha)$  is Lipschitz continuous in  $x$  since it is continuously differentiable on the closed  $\mathcal{X}$ . Then since  $F(x, \alpha)$  is strongly monotone on  $\mathcal{X}$  (given  $\alpha$ ), Theorem 2.3.3 in (Facchinei & Pang, 2007) states that for all  $x \in \mathcal{X}$ , for some  $L_0 > 0$

$$\|x - x^*(\alpha)\| \leq L_0 \|x - \Pi_{\mathcal{X}}(x - F(x, \alpha))\|. \quad (33)$$

Hence for  $x^*(\alpha_2)$ ,  $x^*(\alpha_1)$  we have

$$\begin{aligned} & \|x^*(\alpha_2) - x^*(\alpha_1)\| \leq \\ & L_0 \|x^*(\alpha_2) - \Pi_{\mathcal{X}}(x^*(\alpha_2) - F(x^*(\alpha_2), \alpha_1))\| = \\ & L_0 \left\| x^*(\alpha_2) - \Pi_{\mathcal{X}}(x^*(\alpha_2) - F(x^*(\alpha_2), \alpha_1)) + \right. \\ & \quad \left. \Pi_{\mathcal{X}}(x^*(\alpha_2) - F(x^*(\alpha_2), \alpha_2)) - \right. \\ & \quad \left. \Pi_{\mathcal{X}}(x^*(\alpha_2) - F(x^*(\alpha_2), \alpha_2)) \right\| \stackrel{(a)}{=} \\ & L_0 \left\| \Pi_{\mathcal{X}}(x^*(\alpha_2) - F(x^*(\alpha_2), \alpha_2)) - \right. \\ & \quad \left. \Pi_{\mathcal{X}}(x^*(\alpha_2) - F(x^*(\alpha_2), \alpha_1)) \right\| \leq \\ & L_0 \|F(x^*(\alpha_2), \alpha_1) - F(x^*(\alpha_2), \alpha_2)\| = \\ & \quad \sqrt{N} L_0 \|\alpha_2 - \alpha_1\| \quad (34) \end{aligned}$$

where in (a) we used that

$$x^*(\alpha_2) - \Pi_{\mathcal{X}}(x^*(\alpha_2) - F(x^*(\alpha_2), \alpha_2)) = \mathbf{0} \quad (35)$$

which follows from Proposition 1.5.8 in (Facchinei & Pang, 2007).

## 12. Proof of Lemma 4

Let  $\alpha_1, \alpha_2 \in \mathbb{R}_+^K$ . Let  $x_1^* = x^*(\alpha_1)$  and  $x_2^* = x^*(\alpha_2)$ . Since  $x_1^*$  is a NE, we have for every  $x \in \mathcal{X}$  that (see Proposition 1.4.2 in (Facchinei & Pang, 2007)):

$$\langle x - x_1^*, F(x_1^*, \alpha_1) \rangle \leq 0 \quad (36)$$

so for  $x = x_2^*$

$$\langle x_2^* - x_1^*, F(x_1^*, \alpha_1) \rangle \leq 0. \quad (37)$$

Since  $x_2^*$  is a NE, we have for  $x \in \mathcal{X}$  that

$$\langle x - x_2^*, F(x_2^*, \alpha_2) \rangle \leq 0 \quad (38)$$

so for  $x = x_1^*$

$$\langle x_1^* - x_2^*, F(x_2^*, \alpha_2) \rangle \leq 0. \quad (39)$$

By adding (37) and (39) we obtain

$$\langle x_2^* - x_1^*, F(x_2^*, \alpha_2) - F(x_1^*, \alpha_1) \rangle \geq 0. \quad (40)$$

Then

$$\begin{aligned} -\lambda \|x^*(\alpha_2) - x^*(\alpha_1)\|^2 &= -\lambda \|x_2^* - x_1^*\|^2 \stackrel{(a)}{\geq} \\ & \langle x_2^* - x_1^*, F(x_2^*, \alpha_1) - F(x_1^*, \alpha_1) \rangle \stackrel{(b)}{=} \\ & \langle x_2^* - x_1^*, F(x_2^*, \alpha_2) - F(x_1^*, \alpha_1) \rangle + \\ & \left\langle \sum_{n=1}^N (x_n^*(\alpha_2) - x_n^*(\alpha_1)), \alpha_2 - \alpha_1 \right\rangle \stackrel{(c)}{\geq} \\ & \left\langle \sum_{n=1}^N (x_n^*(\alpha_2) - x_n^*(\alpha_1)), \alpha_2 - \alpha_1 \right\rangle \quad (41) \end{aligned}$$

where (a) uses that  $F(x, \alpha_1)$  is strongly monotone in  $x$  with parameter  $\lambda > 0$ , (b) uses the linearity of  $F(x, \alpha)$  in  $\alpha$  and (c) uses (40).

Now let  $\alpha_1, \alpha_2 \in \mathcal{A}^*$  and let  $x^*(\alpha_1), x^*(\alpha_2)$  be the corresponding NE. For every  $k$ ,

- If  $\alpha_1^k = \alpha_2^k = 0$  then  $(\alpha_2^k - \alpha_1^k) \sum_{n=1}^N (x_n^{*k}(\alpha_2) - x_n^{*k}(\alpha_1)) = 0$ .
- If  $\alpha_1^k > 0$  and  $\alpha_2^k > 0$  then  $\sum_{n=1}^N x_n^{*k}(\alpha_1) = \sum_{n=1}^N x_n^{*k}(\alpha_2) = l_k^*$  so  $(\alpha_2^k - \alpha_1^k) \sum_{n=1}^N (x_n^{*k}(\alpha_2) - x_n^{*k}(\alpha_1)) = 0$ .
- If  $\alpha_1^k > 0$  and  $\alpha_2^k = 0$  then  $\sum_{n=1}^N x_n^{*k}(\alpha_2) < l_k^* = \sum_{n=1}^N x_n^{*k}(\alpha_1)$  so  $(\alpha_2^k - \alpha_1^k) \sum_{n=1}^N (x_n^{*k}(\alpha_2) - x_n^{*k}(\alpha_1)) \geq 0$ .
- If  $\alpha_1^k = 0$  and  $\alpha_2^k > 0$  then  $\sum_{n=1}^N x_n^{*k}(\alpha_2) = l_k^* > \sum_{n=1}^N x_n^{*k}(\alpha_1)$  so  $(\alpha_2^k - \alpha_1^k) \sum_{n=1}^N (x_n^{*k}(\alpha_2) - x_n^{*k}(\alpha_1)) \geq 0$ .

We conclude that if  $\alpha_1, \alpha_2 \in \mathcal{A}^*$  then

$$\left\langle \sum_{n=1}^N (x_n^*(\alpha_2) - x_n^*(\alpha_1)), \alpha_2 - \alpha_1 \right\rangle \geq 0 \quad (42)$$

which by (41) implies that  $x^*(\alpha_2) = x^*(\alpha_1)$ .

### 13. Proof of Lemma 5

First we bound the distance between  $\mathbf{x}_t$  and the new NE  $\mathbf{x}^*(\alpha_t)$ . With probability 1, for some constant  $C_0 > 0$ ,

$$\begin{aligned} \|\mathbf{x}_t - \mathbf{x}^*(\alpha_t)\|^2 &= \\ &\|\mathbf{x}_t - \mathbf{x}^*(\alpha_{t-1}) + \mathbf{x}^*(\alpha_{t-1}) - \mathbf{x}^*(\alpha_t)\|^2 \stackrel{(a)}{\leq} \\ &\|\mathbf{x}_t - \mathbf{x}^*(\alpha_{t-1})\|^2 + \|\mathbf{x}^*(\alpha_t) - \mathbf{x}^*(\alpha_{t-1})\|^2 + \\ &2\|\mathbf{x}_t - \mathbf{x}^*(\alpha_{t-1})\| \|\mathbf{x}^*(\alpha_t) - \mathbf{x}^*(\alpha_{t-1})\| \stackrel{(b)}{\leq} \\ &\|\mathbf{x}_t - \mathbf{x}^*(\alpha_{t-1})\|^2 + \varepsilon_{t-1}^2 L^2 \left\| \sum_{n=1}^N \mathbf{x}_{n,t} - \mathbf{l}^* \right\|^2 \\ &+ 2\varepsilon_{t-1} L \left\| \sum_{n=1}^N \mathbf{x}_{n,t} - \mathbf{l}^* \right\| \|\mathbf{x}_t - \mathbf{x}^*(\alpha_{t-1})\| \stackrel{(c)}{\leq} \\ &\|\mathbf{x}_t - \mathbf{x}^*(\alpha_{t-1})\|^2 + C_0 \varepsilon_t \quad (43) \end{aligned}$$

where (a) is Cauchy-Schwarz, (b) follows from Lemma 3 and (c) uses that  $\mathbf{x}_{n,t}$ ,  $\mathbf{x}_t$  and  $\mathbf{x}^*(\alpha_{t-1})$  are bounded and that  $\frac{\varepsilon_{t+1}}{\varepsilon_t} \rightarrow 1$  as  $t \rightarrow \infty$  (condition 4 of Theorem 1).

Note that  $\mathbf{1}_N \otimes \alpha_t$  concatenates  $\alpha_t$   $N$  times. Next we bound the norm of the stochastic gradient vector. With probability 1, we have that for some constants  $B_0, B_1, B_2 > 0$ ,

$$\begin{aligned} \eta_t \|\mathbf{g}_t - \mathbf{1}_N \otimes \alpha_t\| &\leq \eta_t \left( \sqrt{N} \|\alpha_t\| + \|\mathbf{g}_t\| \right) \stackrel{(a)}{\leq} \\ \eta_t B_0 \left( \|\alpha_0\| + \sum_{\tau=0}^{t-1} \varepsilon_\tau \left\| \sum_{n=1}^N \mathbf{x}_{n,\tau+1} - \mathbf{l}^* \right\| + \|\mathbf{g}_t\| \right) &\leq \\ \eta_t B_1 \left( \sum_{\tau=0}^{t-1} \varepsilon_\tau + \|\mathbf{g}_t\| \right) &\stackrel{(b)}{\leq} B_2 (\sqrt{\varepsilon_t} + \eta_t \|\mathbf{g}_t\|) \quad (44) \end{aligned}$$

where (a) iterates over

$$\begin{aligned} \|\alpha_{t+1}\| &= \left\| \left[ \alpha_t + \varepsilon_t \left( \sum_{n=1}^N \mathbf{x}_{n,t+1} - \mathbf{l}^* \right) \right]^+ \right\| \leq \\ &\|\alpha_t\| + \varepsilon_t \left\| \sum_{n=1}^N \mathbf{x}_{n,t+1} - \mathbf{l}^* \right\| \quad (45) \end{aligned}$$

and (b) uses condition 3 of Theorem 1. To see that, let  $\rho > 0$ . Then pick a large enough  $T_0$  such that for all  $t > T_0$  we have  $B_1 \frac{\eta_t \sum_{\tau=0}^{t-1} \varepsilon_\tau}{\sqrt{\varepsilon_t}} < \rho$ . Hence we can use  $B_2 = \max \left\{ B_1 \max_{0 \leq t \leq T_0} \frac{\eta_t \sum_{\tau=0}^{t-1} \varepsilon_\tau}{\sqrt{\varepsilon_t}}, \rho, B_1 \right\}$ .

Now we can analyze the gradient behavior. Recall the definition of  $F(\mathbf{x}, \alpha)$  in (16). Then, with probability 1, for

some constants  $C_1, C_2, C_3 > 0$ ,

$$\begin{aligned} \eta_t \mathbb{E} \{ \langle \mathbf{x}_t - \mathbf{x}^*(\alpha_t), \mathbf{g}_t - \mathbf{1}_N \otimes \alpha_t \rangle \mid \mathcal{F}_t \} &= \\ \eta_t \mathbb{E} \{ \langle \mathbf{x}_t - \mathbf{x}^*(\alpha_{t-1}), \mathbf{g}_t - \mathbf{1}_N \otimes \alpha_t \rangle \mid \mathcal{F}_t \} &+ \\ + \eta_t \mathbb{E} \{ \langle \mathbf{x}^*(\alpha_{t-1}) - \mathbf{x}^*(\alpha_t), \mathbf{g}_t - \mathbf{1}_N \otimes \alpha_t \rangle \mid \mathcal{F}_t \} &\leq \\ \eta_t \langle \mathbf{x}_t - \mathbf{x}^*(\alpha_{t-1}), \mathbb{E} \{ \mathbf{g}_t - \mathbf{1}_N \otimes \alpha_t \mid \mathcal{F}_t \} - F(\mathbf{x}_t, \alpha_{t-1}) \rangle &+ \\ + \eta_t \langle \mathbf{x}_t - \mathbf{x}^*(\alpha_{t-1}), F(\mathbf{x}_t, \alpha_{t-1}) \rangle &+ \\ + \eta_t \mathbb{E} \{ \|\mathbf{x}^*(\alpha_t) - \mathbf{x}^*(\alpha_{t-1})\| \|\mathbf{g}_t - \mathbf{1}_N \otimes \alpha_t\| \mid \mathcal{F}_t \} &\stackrel{(a)}{\leq} \\ \sqrt{N} \eta_t \|\mathbf{x}_t - \mathbf{x}^*(\alpha_{t-1})\| \|\alpha_t - \alpha_{t-1}\| &+ \\ + \eta_t \|\mathbf{x}_t - \mathbf{x}^*(\alpha_{t-1})\| \|\mathbb{E} \{ \mathbf{g}_t \mid \mathcal{F}_t \} - F(\mathbf{x}_t) \| &- \\ - \lambda \eta_t \|\mathbf{x}_t - \mathbf{x}^*(\alpha_{t-1})\|^2 &+ \\ + C_1 \varepsilon_t \eta_t \mathbb{E} \{ \|\mathbf{g}_t - \mathbf{1}_N \otimes \alpha_t\| \mid \mathcal{F}_t \} &\stackrel{(b)}{\leq} \\ \eta_t \delta_t \|\mathbf{x}_t - \mathbf{x}^*(\alpha_{t-1})\| - \lambda \eta_t \|\mathbf{x}_t - \mathbf{x}^*(\alpha_{t-1})\|^2 &+ \\ + C_2 \varepsilon_t^{3/2} + C_3 \eta_t \varepsilon_t \quad (46) \end{aligned}$$

where (a) uses that  $\|\mathbf{x}^*(\alpha_t) - \mathbf{x}^*(\alpha_{t-1})\| \leq C_1 \varepsilon_t$  (Lemma 3 and  $\frac{\varepsilon_{t+1}}{\varepsilon_t} \rightarrow 1$ ), and also that since  $F(\mathbf{x}, \alpha_{t-1})$  is strongly monotone in  $\mathbf{x}$  with parameter  $\lambda > 0$ , then

$$\begin{aligned} \langle \mathbf{x}_t - \mathbf{x}^*(\alpha_{t-1}), F(\mathbf{x}_t, \alpha_{t-1}) \rangle &\stackrel{(a)}{\leq} \\ \langle \mathbf{x}_t - \mathbf{x}^*(\alpha_{t-1}), F(\mathbf{x}_t, \alpha_{t-1}) - F(\mathbf{x}^*(\alpha_{t-1}), \alpha_{t-1}) \rangle &+ \\ \leq -\lambda \|\mathbf{x}_t - \mathbf{x}^*(\alpha_{t-1})\|^2 \quad (47) \end{aligned}$$

where (a) follows since  $\langle \mathbf{x} - \mathbf{x}^*(\alpha), F(\mathbf{x}^*(\alpha), \alpha) \rangle \leq 0$  for all  $\alpha \in \mathbb{R}_+^K$  and  $\mathbf{x} \in \mathcal{X}$ , since  $\mathbf{x}^*(\alpha)$  is a NE (see Proposition 1.4.2 in (Facchinei & Pang, 2007)). Inequality (b) in (46) follows from (44) and the assumption in Definition 3.

Now we can bound how the distance from NE evolves. Then, with probability 1, for some constants  $C_4, C_5, C_6 > 0$ ,

$$\begin{aligned} \mathbb{E} \left\{ \|\mathbf{x}_{t+1} - \mathbf{x}^*(\alpha_t)\|^2 \mid \mathcal{F}_t \right\} &\stackrel{(a)}{\leq} \\ \mathbb{E} \left\{ \|\mathbf{x}_t + \eta_t (\mathbf{g}_t - \mathbf{1}_N \otimes \alpha_t) - \mathbf{x}^*(\alpha_t)\|^2 \mid \mathcal{F}_t \right\} &= \\ \mathbb{E} \left\{ \|\mathbf{x}_t - \mathbf{x}^*(\alpha_t)\|^2 + \eta_t^2 \|\mathbf{g}_t - \mathbf{1}_N \otimes \alpha_t\|^2 \mid \mathcal{F}_t \right\} &+ \\ + 2\eta_t \mathbb{E} \{ \langle \mathbf{x}_t - \mathbf{x}^*(\alpha_t), \mathbf{g}_t - \mathbf{1}_N \otimes \alpha_t \rangle \mid \mathcal{F}_t \} &\stackrel{(b)}{\leq} \\ \|\mathbf{x}_t - \mathbf{x}^*(\alpha_{t-1})\|^2 + C_0 \varepsilon_t + C_4 \left( \varepsilon_t + \eta_t^2 \mathbb{E} \left\{ \|\mathbf{g}_t\|^2 \mid \mathcal{F}_t \right\} \right) &+ \\ + 2\eta_t \delta_t \|\mathbf{x}_t - \mathbf{x}^*(\alpha_{t-1})\| - 2\lambda \eta_t \|\mathbf{x}_t - \mathbf{x}^*(\alpha_{t-1})\|^2 &+ \\ + 2C_2 \varepsilon_t^{3/2} + 2C_3 \eta_t \varepsilon_t &\stackrel{(c)}{\leq} \\ (1 - 2\eta_t (\lambda - \delta_t)) \|\mathbf{x}_t - \mathbf{x}^*(\alpha_{t-1})\|^2 + 2\eta_t \delta_t + C_5 \varepsilon_t + C_6 \eta_t^2 & \quad (48) \end{aligned}$$

where (a) uses  $\|\Pi_{\mathcal{X}}\mathbf{y} - \mathbf{x}\| \leq \|\mathbf{y} - \mathbf{x}\|$  for any  $\mathbf{x} \in \mathcal{X}$  since  $\mathcal{X}$  is convex. Inequality (b) uses (43), (44), and (46) and inequality (c) uses Definition 3 and  $x \leq x^2 + 1$ .

The last step of the proof is to use (48) to show by induction that for every  $t \geq 1$

$$\mathbb{E} \left\{ \|\mathbf{x}_t - \mathbf{x}^*(\alpha_{t-1})\|^2 \right\} \leq A \frac{\varepsilon_t}{\eta_t} \quad (49)$$

for some  $A > 0$ . First we define  $T_0$  to be large enough such that  $\delta_t \leq \frac{\lambda}{4}$ ,  $\max\{\eta_t^2, \eta_t \delta_t\} \leq C_7 \varepsilon_t$  for some  $C_7 > 0$  and also that  $\frac{\varepsilon_t - \varepsilon_{t+1}}{\eta_t} \leq \lambda \varepsilon_t$  for all  $t > T_0$  (using conditions 1,2,4 of Theorem 1). Then we pick  $A = \max \left\{ \max_{1 \leq t \leq T_0} \frac{\eta_t}{\varepsilon_t} \mathbb{E} \left\{ \|\mathbf{x}_t - \mathbf{x}^*(\alpha_{t-1})\|^2 \right\}, A_0 \right\}$  for some  $A_0$  that is specified below, which is a constant with respect to  $t$ . Hence for all  $1 \leq t \leq T_0$  (49) holds. For  $t > T_0$  we take the expectation on both sides of (48) to obtain

$$\begin{aligned} & \mathbb{E} \left\{ \|\mathbf{x}_{t+1} - \mathbf{x}^*(\alpha_t)\|^2 \right\} \leq \\ & (1 - 2\eta_t(\lambda - \delta_t)) \mathbb{E} \left\{ \|\mathbf{x}_t - \mathbf{x}^*(\alpha_{t-1})\|^2 \right\} \\ & + 2\eta_t \delta_t + C_5 \varepsilon_t + C_6 \eta_t^2 \stackrel{(a)}{\leq} \left(1 - \frac{3}{2}\eta_t \lambda\right) A \frac{\varepsilon_t}{\eta_t} + D_0 \varepsilon_t = \\ & A \frac{\varepsilon_t}{\eta_t} + \left(D_0 - \frac{3}{2}\lambda A\right) \varepsilon_t \stackrel{(b)}{\leq} A \left(\frac{\varepsilon_t}{\eta_t} - \lambda \varepsilon_t\right) \stackrel{(c)}{\leq} A \frac{\varepsilon_{t+1}}{\eta_{t+1}} \end{aligned} \quad (50)$$

where (a) follows for some constant  $D_0 > 0$  since  $\delta_t \leq \frac{\lambda}{4}$  and  $\max\{\eta_t^2, \eta_t \delta_t\} \leq C_7 \varepsilon_t$  for  $t > T_0$ . In (b) we used  $A \geq \frac{2D_0}{\lambda}$  so we set  $A_0 = \frac{2D_0}{\lambda}$  and in (c) we used that  $\frac{\varepsilon_t - \varepsilon_{t+1}}{\eta_t} \leq \lambda \varepsilon_t$  so  $\frac{\varepsilon_{t+1}}{\eta_{t+1}} \geq \frac{\varepsilon_t}{\eta_t} - \lambda \varepsilon_t$ .

## 14. Proof of Theorem 1

We have that with probability 1

$$\begin{aligned} & \min_{\alpha^* \in \mathcal{A}^*} \|\alpha_{t+1} - \alpha^*\|^2 = \\ & \min_{\alpha^* \in \mathcal{A}^*} \left\| \left[ \alpha_t + \varepsilon_t \left( \sum_{n=1}^N \mathbf{x}_{n,t+1} - \mathbf{l}^* \right) \right]^+ - \alpha^* \right\|^2 \stackrel{(a)}{\leq} \\ & \min_{\alpha^* \in \mathcal{A}^*} \left\| \alpha_t + \varepsilon_t \left( \sum_{n=1}^N \mathbf{x}_{n,t+1} - \mathbf{l}^* \right) - \alpha^* \right\|^2 = \\ & \min_{\alpha^* \in \mathcal{A}^*} \left[ \|\alpha_t - \alpha^*\|^2 + 2\varepsilon_t \left\langle \sum_{n=1}^N \mathbf{x}_{n,t+1} - \mathbf{l}^*, \alpha_t - \alpha^* \right\rangle \right] \\ & \quad + \varepsilon_t^2 \left\| \sum_{n=1}^N \mathbf{x}_{n,t+1} - \mathbf{l}^* \right\|^2 \stackrel{(b)}{\leq} \\ & \min_{\alpha^* \in \mathcal{A}^*} \left[ \|\alpha_t - \alpha^*\|^2 + 2\varepsilon_t \left\langle \sum_{n=1}^N (\mathbf{x}_{n,t+1} - \mathbf{x}_n^*(\alpha_t)), \alpha_t - \alpha^* \right\rangle \right] \\ & \quad + 2\varepsilon_t \left\langle \sum_{n=1}^N \mathbf{x}_n^*(\alpha_t) - \mathbf{x}_n^*(\alpha^*), \alpha_t - \alpha^* \right\rangle \\ & \quad + 2\varepsilon_t \left\langle \sum_{n=1}^N \mathbf{x}_n^*(\alpha^*) - \mathbf{l}^*, \alpha_t - \alpha^* \right\rangle + \varepsilon_t^2 D_1 \stackrel{(c)}{\leq} \\ & \min_{\alpha^* \in \mathcal{A}^*} \left[ \|\alpha_t - \alpha^*\|^2 + 2\varepsilon_t \left\| \sum_{n=1}^N (\mathbf{x}_{n,t+1} - \mathbf{x}_n^*(\alpha_t)) \right\| \|\alpha_t - \alpha^*\| \right] \\ & \quad + 2\varepsilon_t \left\langle \sum_{n=1}^N (\mathbf{x}_n^*(\alpha_t) - \mathbf{x}_n^*(\alpha^*)), \alpha_t - \alpha^* \right\rangle \\ & \quad + 2\varepsilon_t \left\langle \sum_{n=1}^N \mathbf{x}_n^*(\alpha^*) - \mathbf{l}^*, \alpha_t - \alpha^* \right\rangle + \varepsilon_t^2 D_1 \stackrel{(d)}{\leq} \\ & \left( 1 + 2\varepsilon_t \left\| \sum_{n=1}^N (\mathbf{x}_{n,t+1} - \mathbf{x}_n^*(\alpha_t)) \right\| \right) \min_{\alpha^* \in \mathcal{A}^*} \|\alpha_t - \alpha^*\|^2 \\ & \quad + 2\varepsilon_t \max_{\alpha^* \in \mathcal{A}^*} \left[ \left\langle \sum_{n=1}^N (\mathbf{x}_n^*(\alpha_t) - \mathbf{x}_n^*(\alpha^*)), \alpha_t - \alpha^* \right\rangle \right. \\ & \quad \left. + \left\langle \sum_{n=1}^N \mathbf{x}_n^*(\alpha^*) - \mathbf{l}^*, \alpha_t - \alpha^* \right\rangle \right] \\ & \quad + 2\varepsilon_t \left\| \sum_{n=1}^N (\mathbf{x}_{n,t+1} - \mathbf{x}_n^*(\alpha_t)) \right\| + \varepsilon_t^2 D_1 \quad (51) \end{aligned}$$

where (a) follows since  $[\mathbf{x}]^+$  can only decrease the distance of  $\mathbf{x}$  to the set  $\mathcal{A}^*$  since  $\alpha^* \geq 0$  for all  $\alpha^* \in \mathcal{A}^*$ . Inequality (b) uses that  $\left\| \sum_{n=1}^N \mathbf{x}_{n,t+1} - \mathbf{l}^* \right\|^2 \leq D_1$  for some  $D_1 > 0$  since  $\mathcal{X}$  is bounded, (c) is Cauchy-Schwarz and (d) uses that  $\min_{\mathbf{x}} (f(\mathbf{x}) + g(\mathbf{x})) \leq \min_{\mathbf{x}} f(\mathbf{x}) + \max_{\mathbf{x}} g(\mathbf{x})$  for any functions  $f(\mathbf{x}), g(\mathbf{x})$  and then uses  $\|\alpha_t - \alpha^*\| \leq$

$\|\alpha_t - \alpha^*\|^2 + 1$ . Define

$$f(\alpha) = -\max_{\alpha^* \in \mathcal{A}^*} \left[ \left\langle \sum_{n=1}^N (\mathbf{x}_n^*(\alpha) - \mathbf{x}_n^*(\alpha^*)), \alpha - \alpha^* \right\rangle + \left\langle \sum_{n=1}^N \mathbf{x}_n^*(\alpha^*) - \mathbf{l}^*, \alpha - \alpha^* \right\rangle \right]. \quad (52)$$

Then  $\left\langle \sum_{n=1}^N (\mathbf{x}_n^*(\alpha) - \mathbf{x}_n^*(\alpha^*)), \alpha - \alpha^* \right\rangle \leq 0$  by Lemma 4 and  $\left\langle \sum_{n=1}^N \mathbf{x}_n^*(\alpha^*) - \mathbf{l}^*, \alpha - \alpha^* \right\rangle \leq 0$  by Lemma 1, for any  $\alpha^* \in \mathcal{A}^*$ , so  $f(\alpha) \geq 0$  for all  $\alpha \in \mathbb{R}_+^K$ .

Define the filtration  $\mathcal{G}_t \triangleq \mathcal{F}_{t+1}$ . By taking the conditional expectation on both sides of (51):

$$\begin{aligned} & \mathbb{E} \left\{ \min_{\alpha^* \in \mathcal{A}^*} \|\alpha_{t+1} - \alpha^*\|^2 \mid \mathcal{G}_t \right\} \leq \\ & \mathbb{E} \left\{ (1 + 2N\varepsilon_t \|\mathbf{x}^*(\alpha_t) - \mathbf{x}_{t+1}\|) \min_{\alpha^* \in \mathcal{A}^*} \|\alpha_t - \alpha^*\|^2 \mid \mathcal{G}_t \right\} \\ & - 2\varepsilon_t f(\alpha_t) + 2N\varepsilon_t \mathbb{E} \left\{ \|\mathbf{x}^*(\alpha_t) - \mathbf{x}_{t+1}\| \mid \mathcal{G}_t \right\} + \varepsilon_t^2 D_1 = \\ & (1 + 2N\varepsilon_t \|\mathbf{x}^*(\alpha_t) - \mathbf{x}_{t+1}\|) \min_{\alpha^* \in \mathcal{A}^*} \|\alpha_t - \alpha^*\|^2 \\ & - 2\varepsilon_t f(\alpha_t) + 2N\varepsilon_t \|\mathbf{x}^*(\alpha_t) - \mathbf{x}_{t+1}\| + \varepsilon_t^2 D_1. \quad (53) \end{aligned}$$

Next we want to apply Robbins-Siegmund ‘‘almost’’ super-martingale Theorem (Robbins & Siegmund, 1971) based on (53). Using their notation, we have  $z_t = \min_{\alpha^* \in \mathcal{A}^*} \|\alpha_t - \alpha^*\|^2$ ,  $\beta_t = 2N\varepsilon_t \|\mathbf{x}^*(\alpha_t) - \mathbf{x}_{t+1}\|$ ,  $\xi_t = 2N\varepsilon_t \|\mathbf{x}^*(\alpha_t) - \mathbf{x}_{t+1}\| + \varepsilon_t^2 D_1$  and  $\zeta_t = 2\varepsilon_t f(\alpha_t) \geq 0$ .

From Lemma 5 we obtain for some  $A > 0$  that

$$\begin{aligned} & \mathbb{E} \left\{ \sum_{t=0}^{\infty} \varepsilon_t \|\mathbf{x}^*(\alpha_t) - \mathbf{x}_{t+1}\| \right\} \stackrel{(a)}{\leq} \\ & \sum_{t=0}^{\infty} \varepsilon_t \mathbb{E} \left\{ \|\mathbf{x}^*(\alpha_t) - \mathbf{x}_{t+1}\| \right\} \leq A \sum_{t=0}^{\infty} \varepsilon_t \sqrt{\frac{\varepsilon_t}{\eta_t}} \stackrel{(b)}{<} \infty \end{aligned} \quad (54)$$

where (a) is Fatou’s Lemma (Billingsley, 2008) and (b) is condition 3 of the Theorem. Hence,  $\sum_{t=0}^{\infty} \varepsilon_t \|\mathbf{x}^*(\alpha_t) - \mathbf{x}_{t+1}\| < \infty$  with probability 1 so  $\sum_{t=0}^{\infty} \beta_t < \infty$  and  $\sum_{t=0}^{\infty} \xi_t < \infty$ , also using that  $\sum_{t=0}^{\infty} \varepsilon_t^2 < \infty$ . Then (Robbins & Siegmund, 1971) states that with probability 1

$$\lim_{t \rightarrow \infty} \min_{\alpha^* \in \mathcal{A}^*} \|\alpha_t - \alpha^*\|^2 = \Lambda \quad (55)$$

for some random variable  $\Lambda$ , and that with probability 1

$$\sum_{t=0}^{\infty} \varepsilon_t f(\alpha_t) < \infty. \quad (56)$$

Now we show that for every  $\alpha \notin \mathcal{A}^*$  we have  $f(\alpha) > 0$ . If  $f(\tilde{\alpha}) = 0$  then both the non-negative terms in (52) are zero, so Lemma 4 implies that if  $f(\tilde{\alpha}) = 0$  then there must exist an  $\alpha^* \in \mathcal{A}^*$  such that  $\mathbf{x}^*(\tilde{\alpha}) = \mathbf{x}^*(\alpha^*)$  and

$$\begin{aligned} 0 &= \left\langle \sum_{n=1}^N \mathbf{x}_n^*(\alpha^*) - \mathbf{l}^*, \tilde{\alpha} - \alpha^* \right\rangle \stackrel{(a)}{=} \\ & \left\langle \sum_{n=1}^N \mathbf{x}_n^*(\alpha^*) - \mathbf{l}^*, \tilde{\alpha} \right\rangle = \left\langle \sum_{n=1}^N \mathbf{x}_n^*(\tilde{\alpha}) - \mathbf{l}^*, \tilde{\alpha} \right\rangle \end{aligned} \quad (57)$$

where (a) uses  $\left\langle \sum_{n=1}^N \mathbf{x}_n^*(\alpha^*) - \mathbf{l}^*, \alpha^* \right\rangle = 0$  (Lemma 1). Hence, by invoking Lemma 1 again, (57) and  $\sum_{n=1}^N \mathbf{x}_n^*(\tilde{\alpha}) = \sum_{n=1}^N \mathbf{x}_n^*(\alpha^*) \leq \mathbf{l}^*$  imply that  $(\mathbf{x}^*(\tilde{\alpha}), \tilde{\alpha})$  solves the VI in (17), so  $\tilde{\alpha} \in \mathcal{A}^*$ .

Let  $\omega \in \Omega$  such that  $\Lambda(\omega) > 0$ , if exists. Then there exist  $T_0(\omega)$  and  $a(\omega), b(\omega) > 0$  such that for all  $t \geq T_0(\omega)$

$$\alpha_t \in \mathcal{R}(\omega) = \left\{ \alpha \mid a(\omega) \leq \min_{\alpha^* \in \mathcal{A}^*} \|\alpha - \alpha^*\|^2 \leq b(\omega) \right\}. \quad (58)$$

Since  $\mathcal{A}^*$  is compact (Lemma 2 shows that  $\mathcal{X}^* \times \mathcal{A}^*$  is compact) then  $g(\alpha) = \min_{\alpha^* \in \mathcal{A}^*} \|\alpha - \alpha^*\|^2$  is continuous, which makes  $\mathcal{R}(\omega)$  compact as well.

Since  $\mathbf{x}^*(\alpha)$  is continuous (Lemma 3), then  $f(\alpha)$  is continuous as a maximum of continuous functions over the compact  $\mathcal{A}^*$  (Lemma 2). Hence,  $\min_{\alpha \in \mathcal{R}(\omega)} f(\alpha) = c$  for

some  $c > 0$ . But then  $\alpha_t \in \mathcal{R}(\omega)$  for all  $t \geq T_0(\omega)$  implies that  $\sum_{t=0}^{\infty} \varepsilon_t f(\alpha_t) = \infty$ , which by (56) cannot occur for more than a measure zero set of  $\omega \in \Omega$ . We conclude that  $\min_{\alpha^* \in \mathcal{A}^*} \|\alpha_t - \alpha^*\|^2 \rightarrow 0$  as  $t \rightarrow \infty$  with probability 1.

Let  $\varepsilon > 0$ . The above implies that for almost all  $\omega \in \Omega$  there exists  $T(\omega)$  such that for all  $t > T(\omega)$  there is a sequence  $\alpha_t^*(\omega) \in \mathcal{A}^*$  such that

$$\|\mathbf{x}^*(\alpha_t) - \mathbf{x}^*(\alpha_t^*(\omega))\| \stackrel{(a)}{\leq} L \|\alpha_t - \alpha_t^*(\omega)\| \leq \varepsilon \quad (59)$$

where (a) follows from the Lipschitz continuity of  $\mathbf{x}^*(\alpha)$  (Lemma 3). However, by Lemma 4 we know that  $\mathbf{x}^*(\alpha) = \mathbf{x}^*$  for all  $\alpha \in \mathcal{A}^*$  for some NE  $\mathbf{x}^*$  such that for all  $k$

$$\sum_{n=1}^N x_n^{*k} = l_k^* \text{ or } \left[ \sum_{n=1}^N x_n^{*k} < l_k^* \text{ and } \alpha_k = 0 \right]. \quad (60)$$

Finally, we conclude that

$$\begin{aligned} \lim_{t \rightarrow \infty} \mathbb{E} \left\{ \|\mathbf{x}_t - \mathbf{x}^*\|^2 \right\} &\leq 2 \lim_{t \rightarrow \infty} \mathbb{E} \left\{ \|\mathbf{x}_t - \mathbf{x}^*(\alpha_{t-1})\|^2 \right\} \\ &+ 2 \lim_{t \rightarrow \infty} \mathbb{E} \left\{ \|\mathbf{x}^* - \mathbf{x}^*(\alpha_{t-1})\|^2 \right\} \stackrel{(a)}{=} 0 \end{aligned} \quad (61)$$

where (a) uses Lemma 5 for the first term (conditions 1, 3 and 4 imply that  $\frac{\varepsilon_t}{\eta_t} \rightarrow 0$ ) and (59) for the second term.
